# Supplementary material
Source: PubMed Central journal article supplement (PMC5989727)

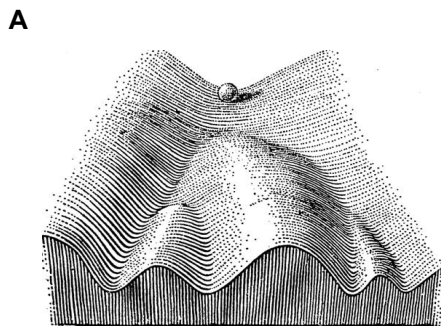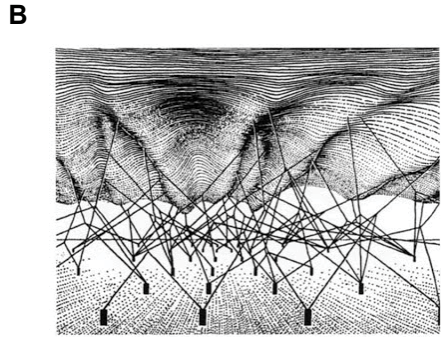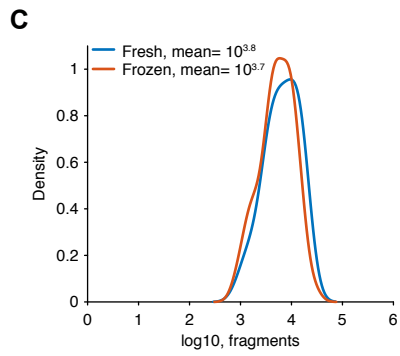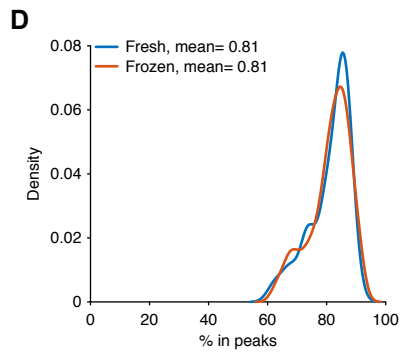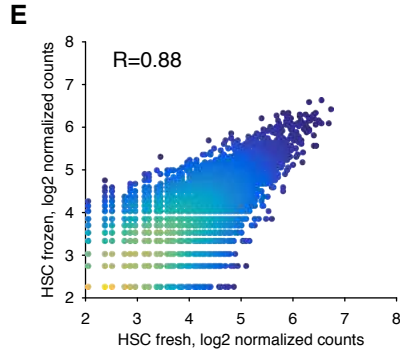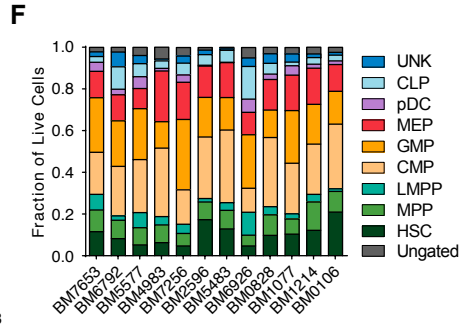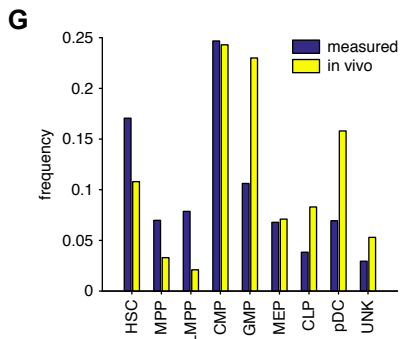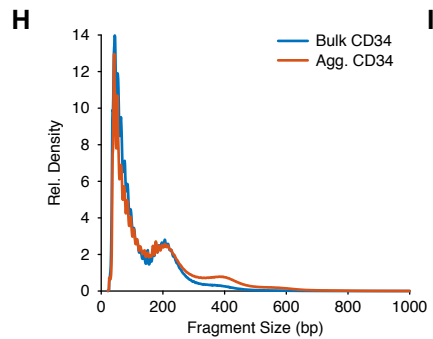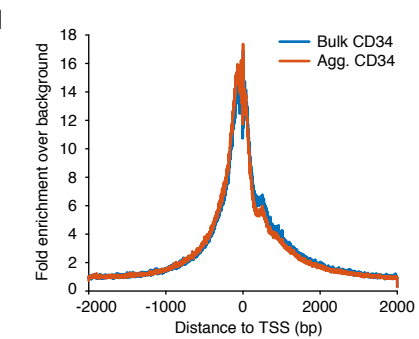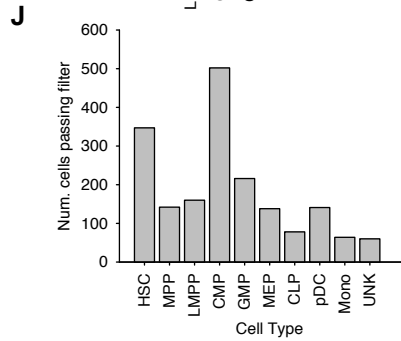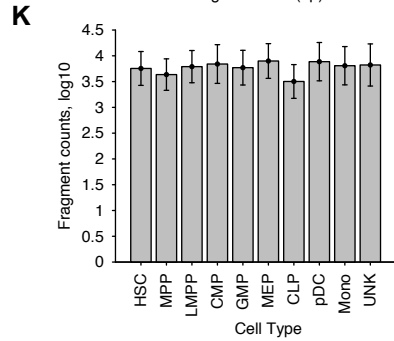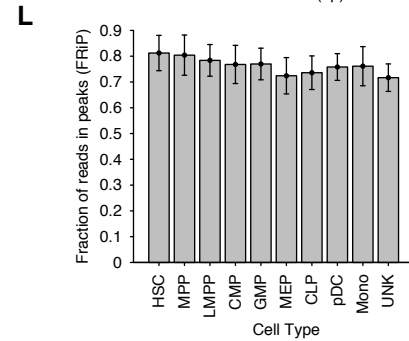

Supplemental Figure 1

Supplement: NIHMS963511-supplement-2.pdf [file NIHMS963511-supplement-2.pdf]

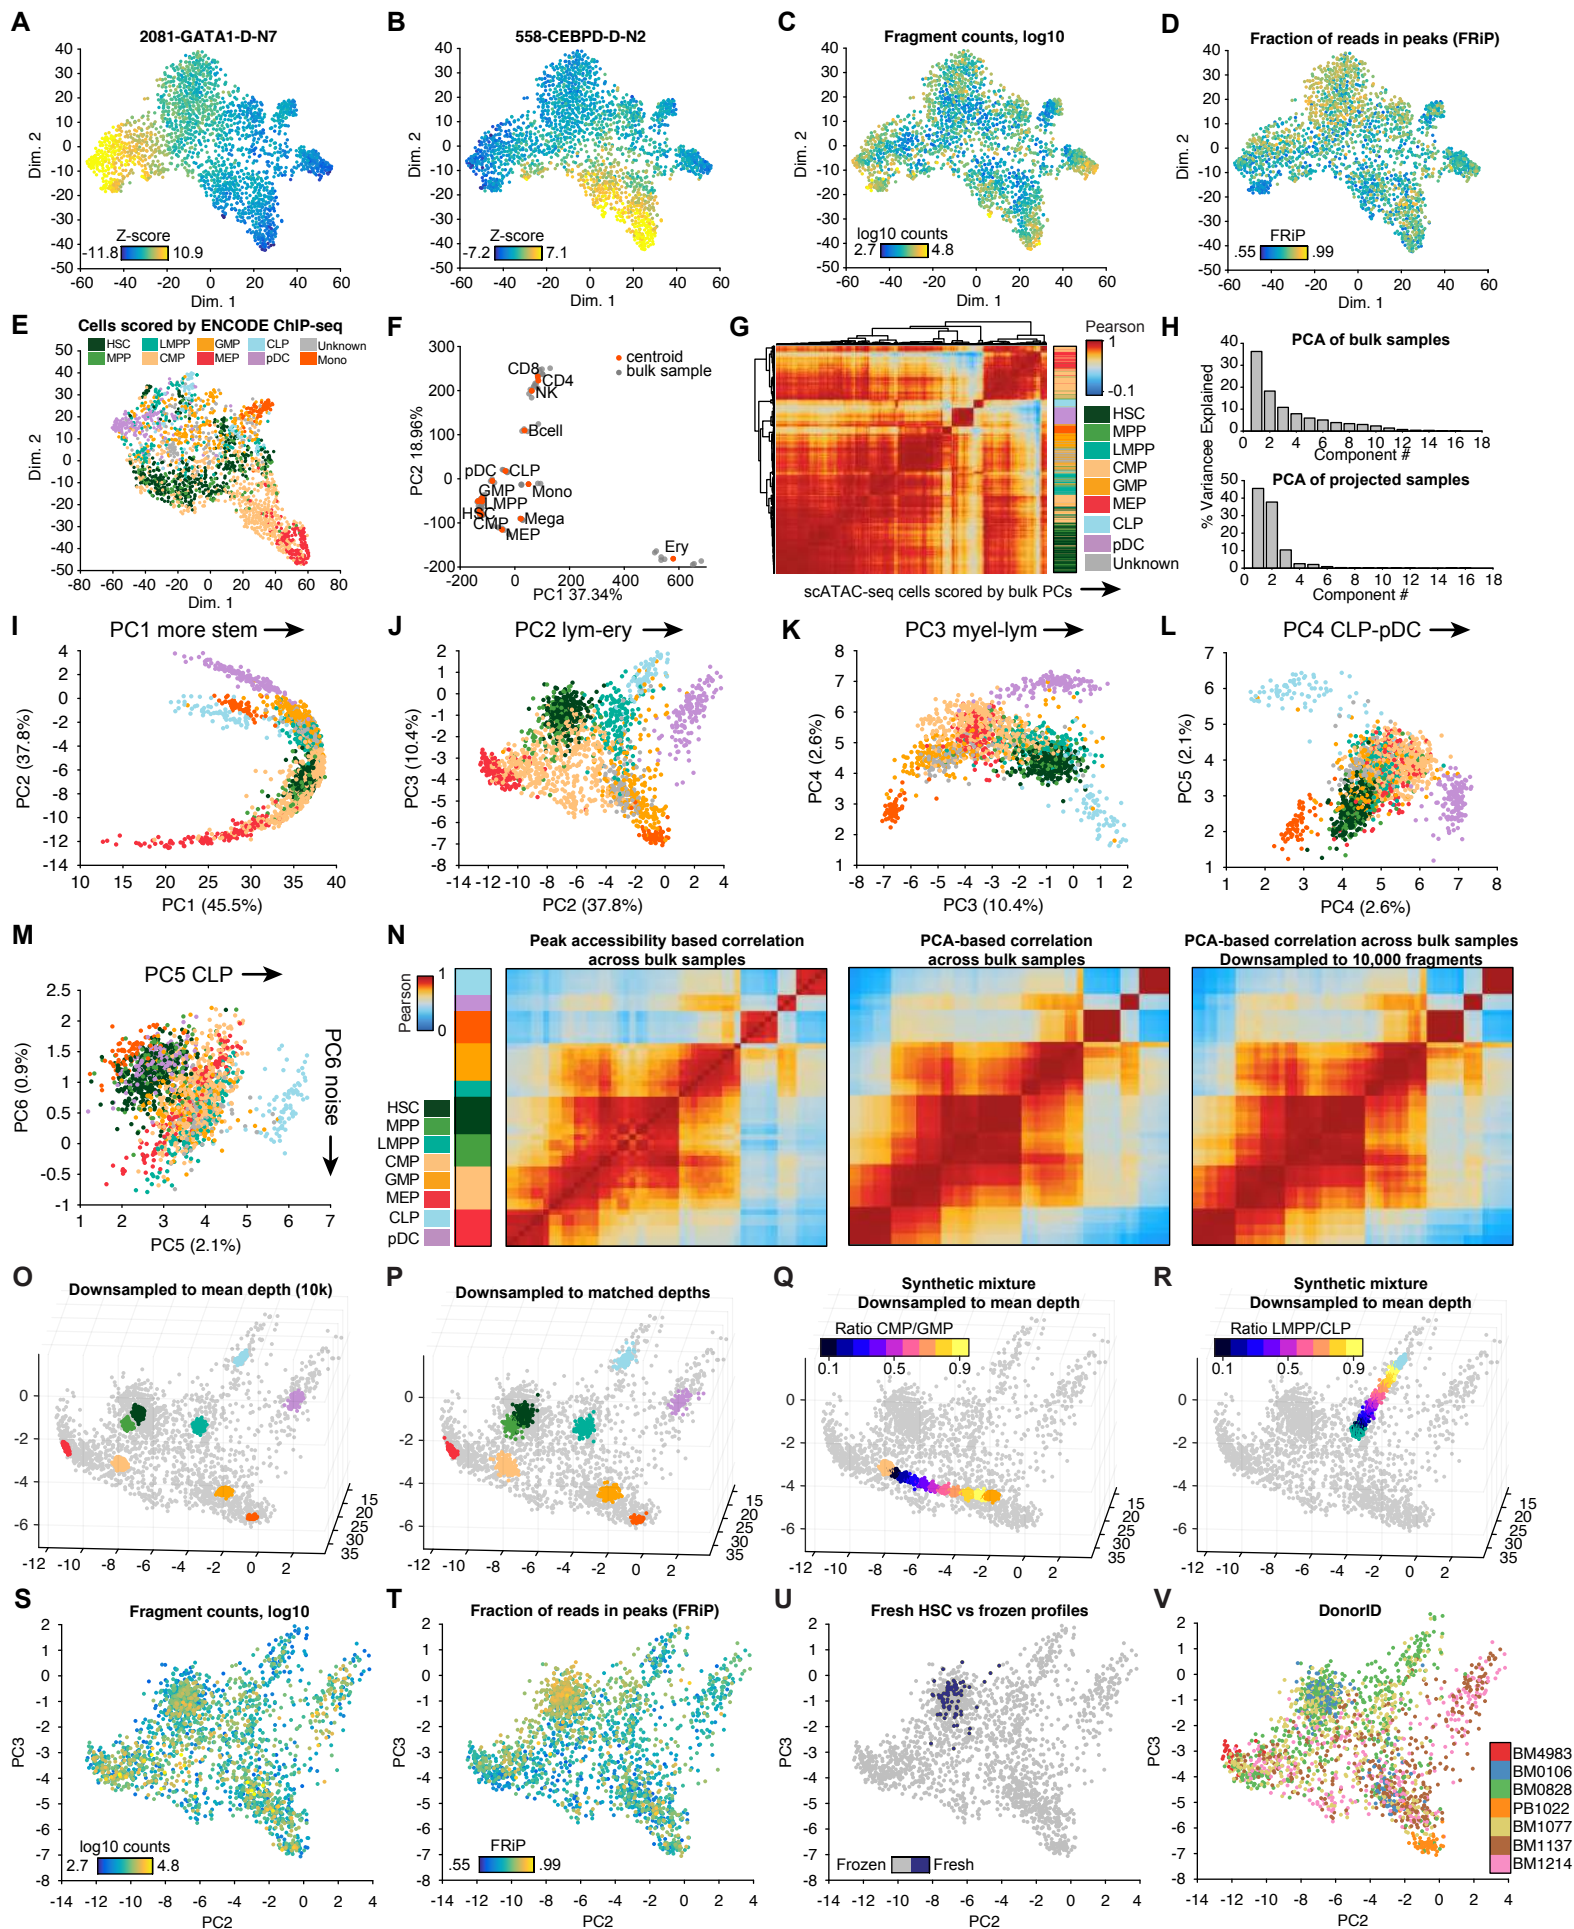

Supplemental Figure 2

Supplement: NIHMS963511-supplement-3.pdf [file NIHMS963511-supplement-3.pdf]

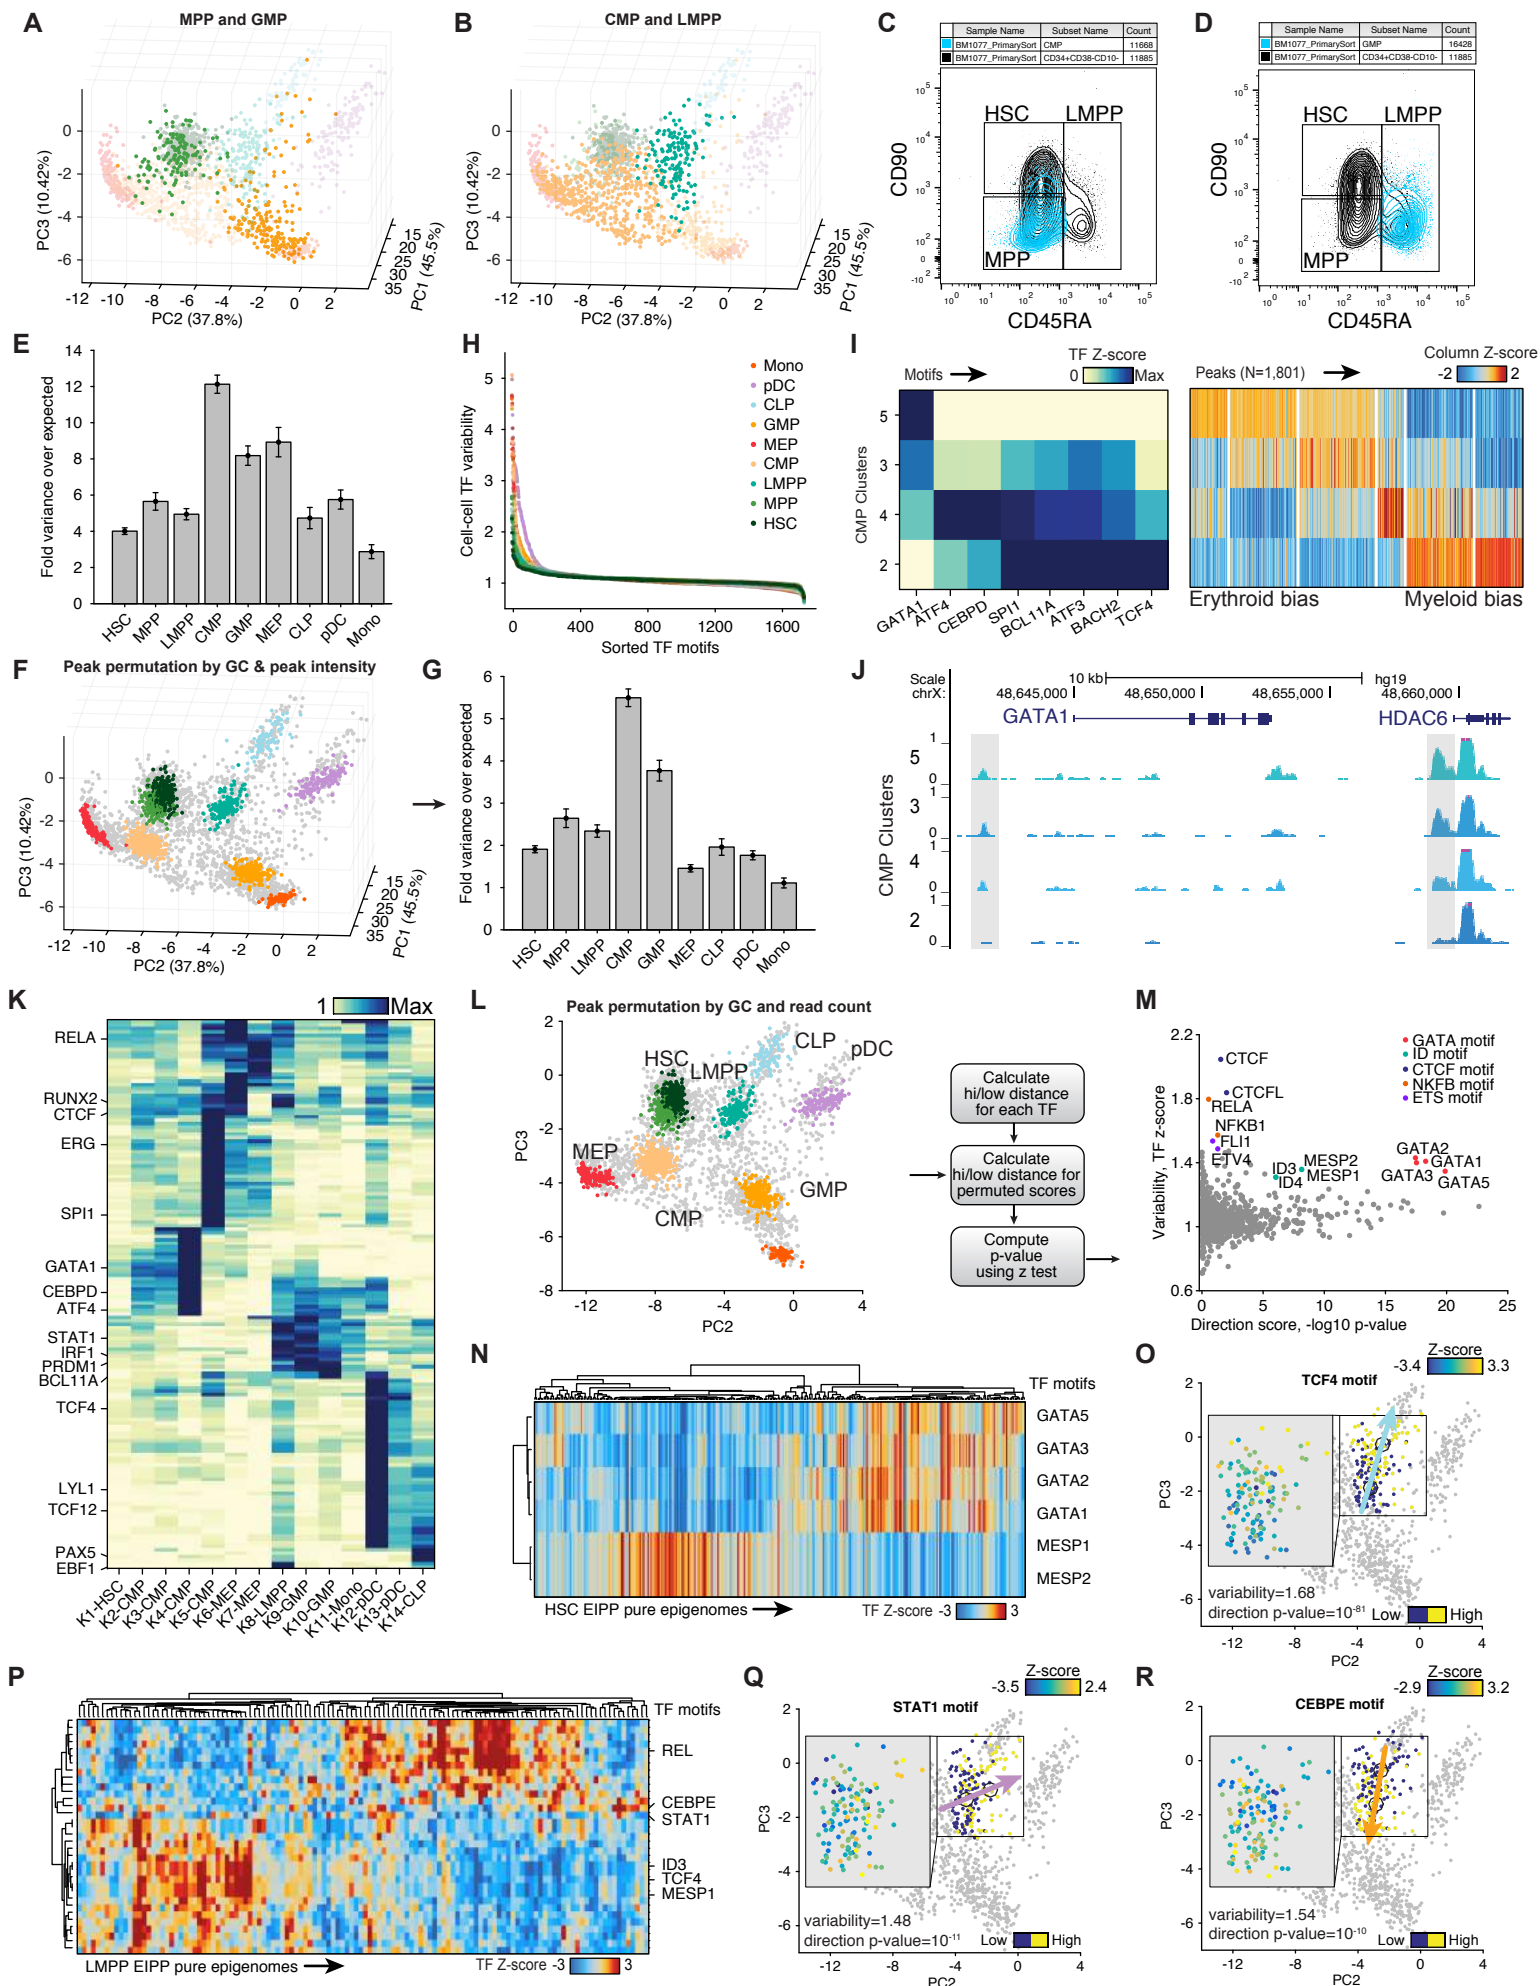

Supplemental Figure 3

Supplement: NIHMS963511-supplement-4.pdf [file NIHMS963511-supplement-4.pdf]

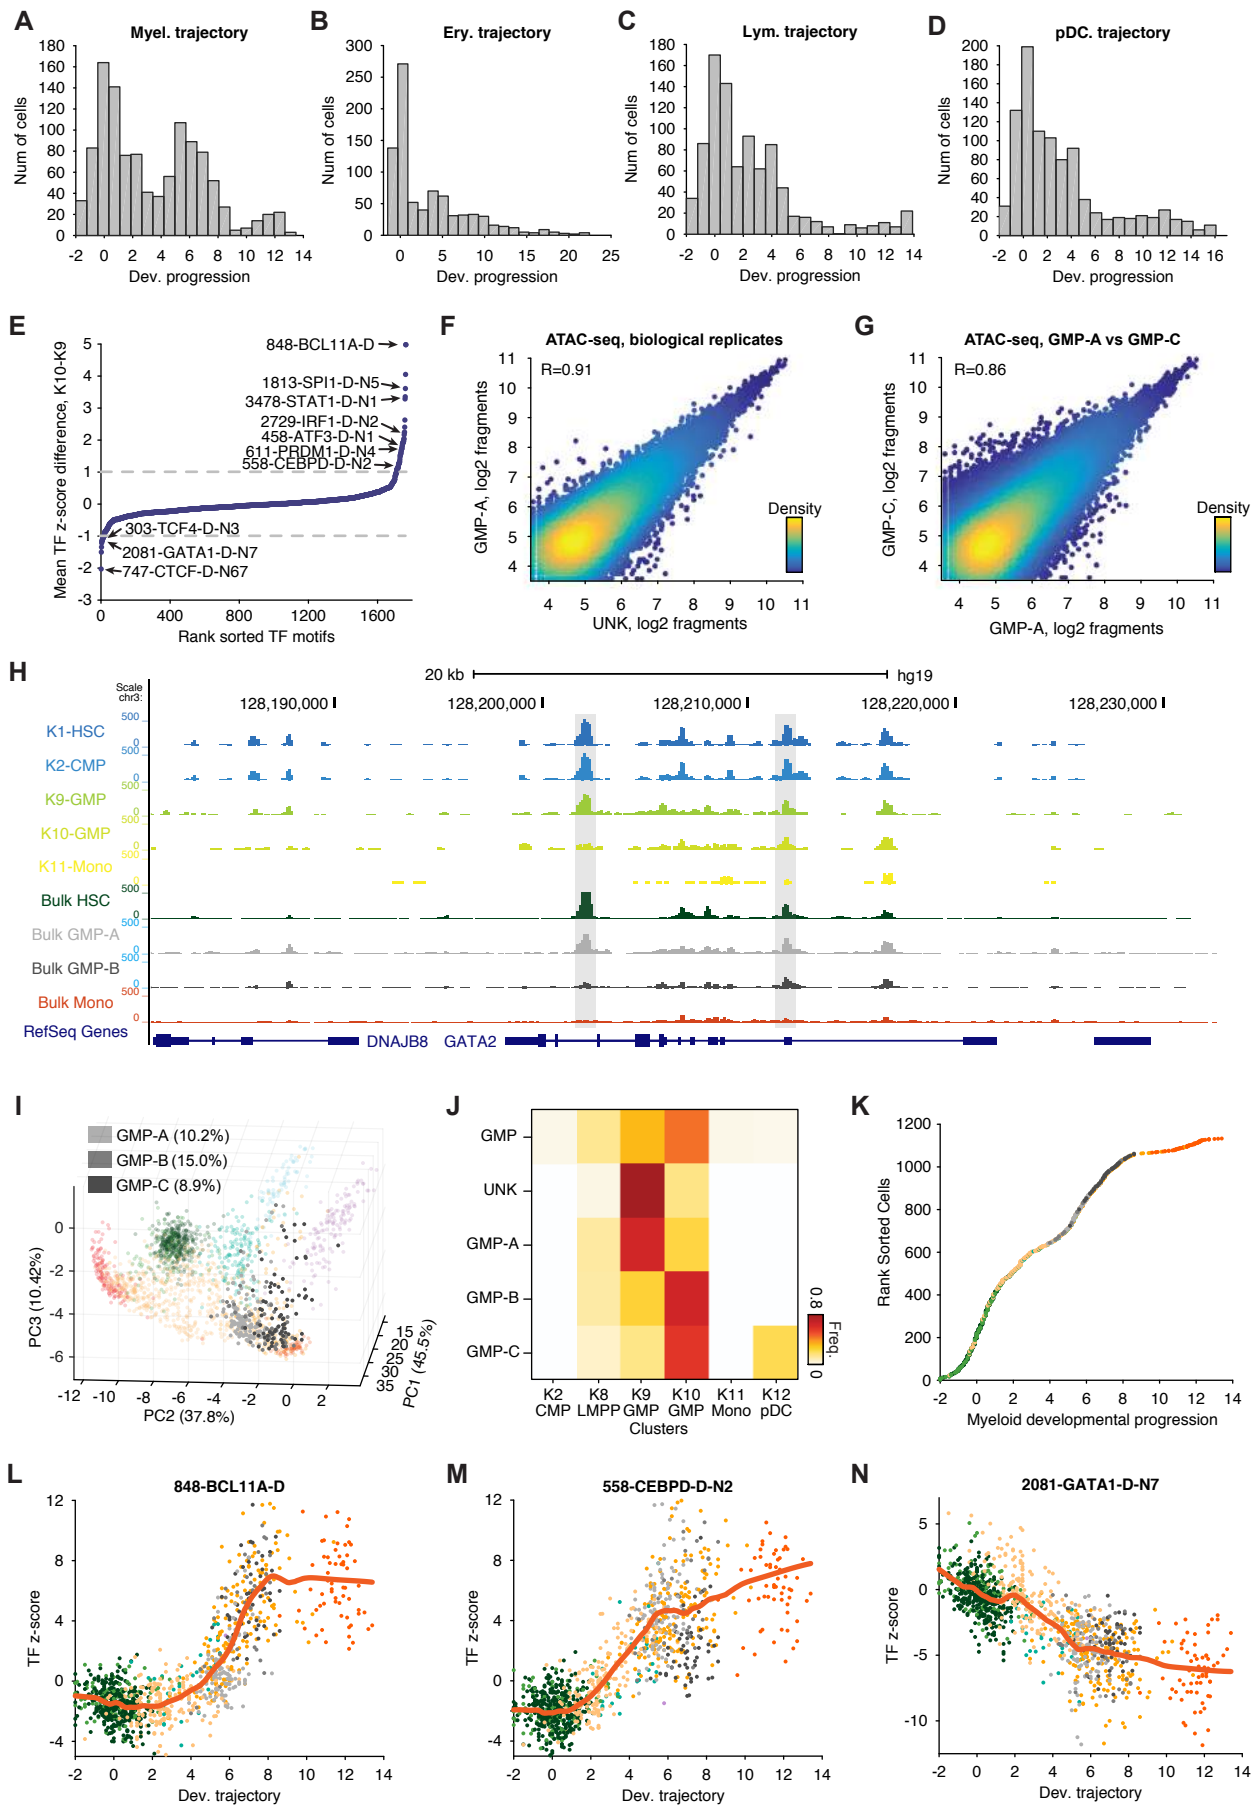

Supplemental Figure 4

Supplement: NIHMS963511-supplement-5.pdf [file NIHMS963511-supplement-5.pdf]

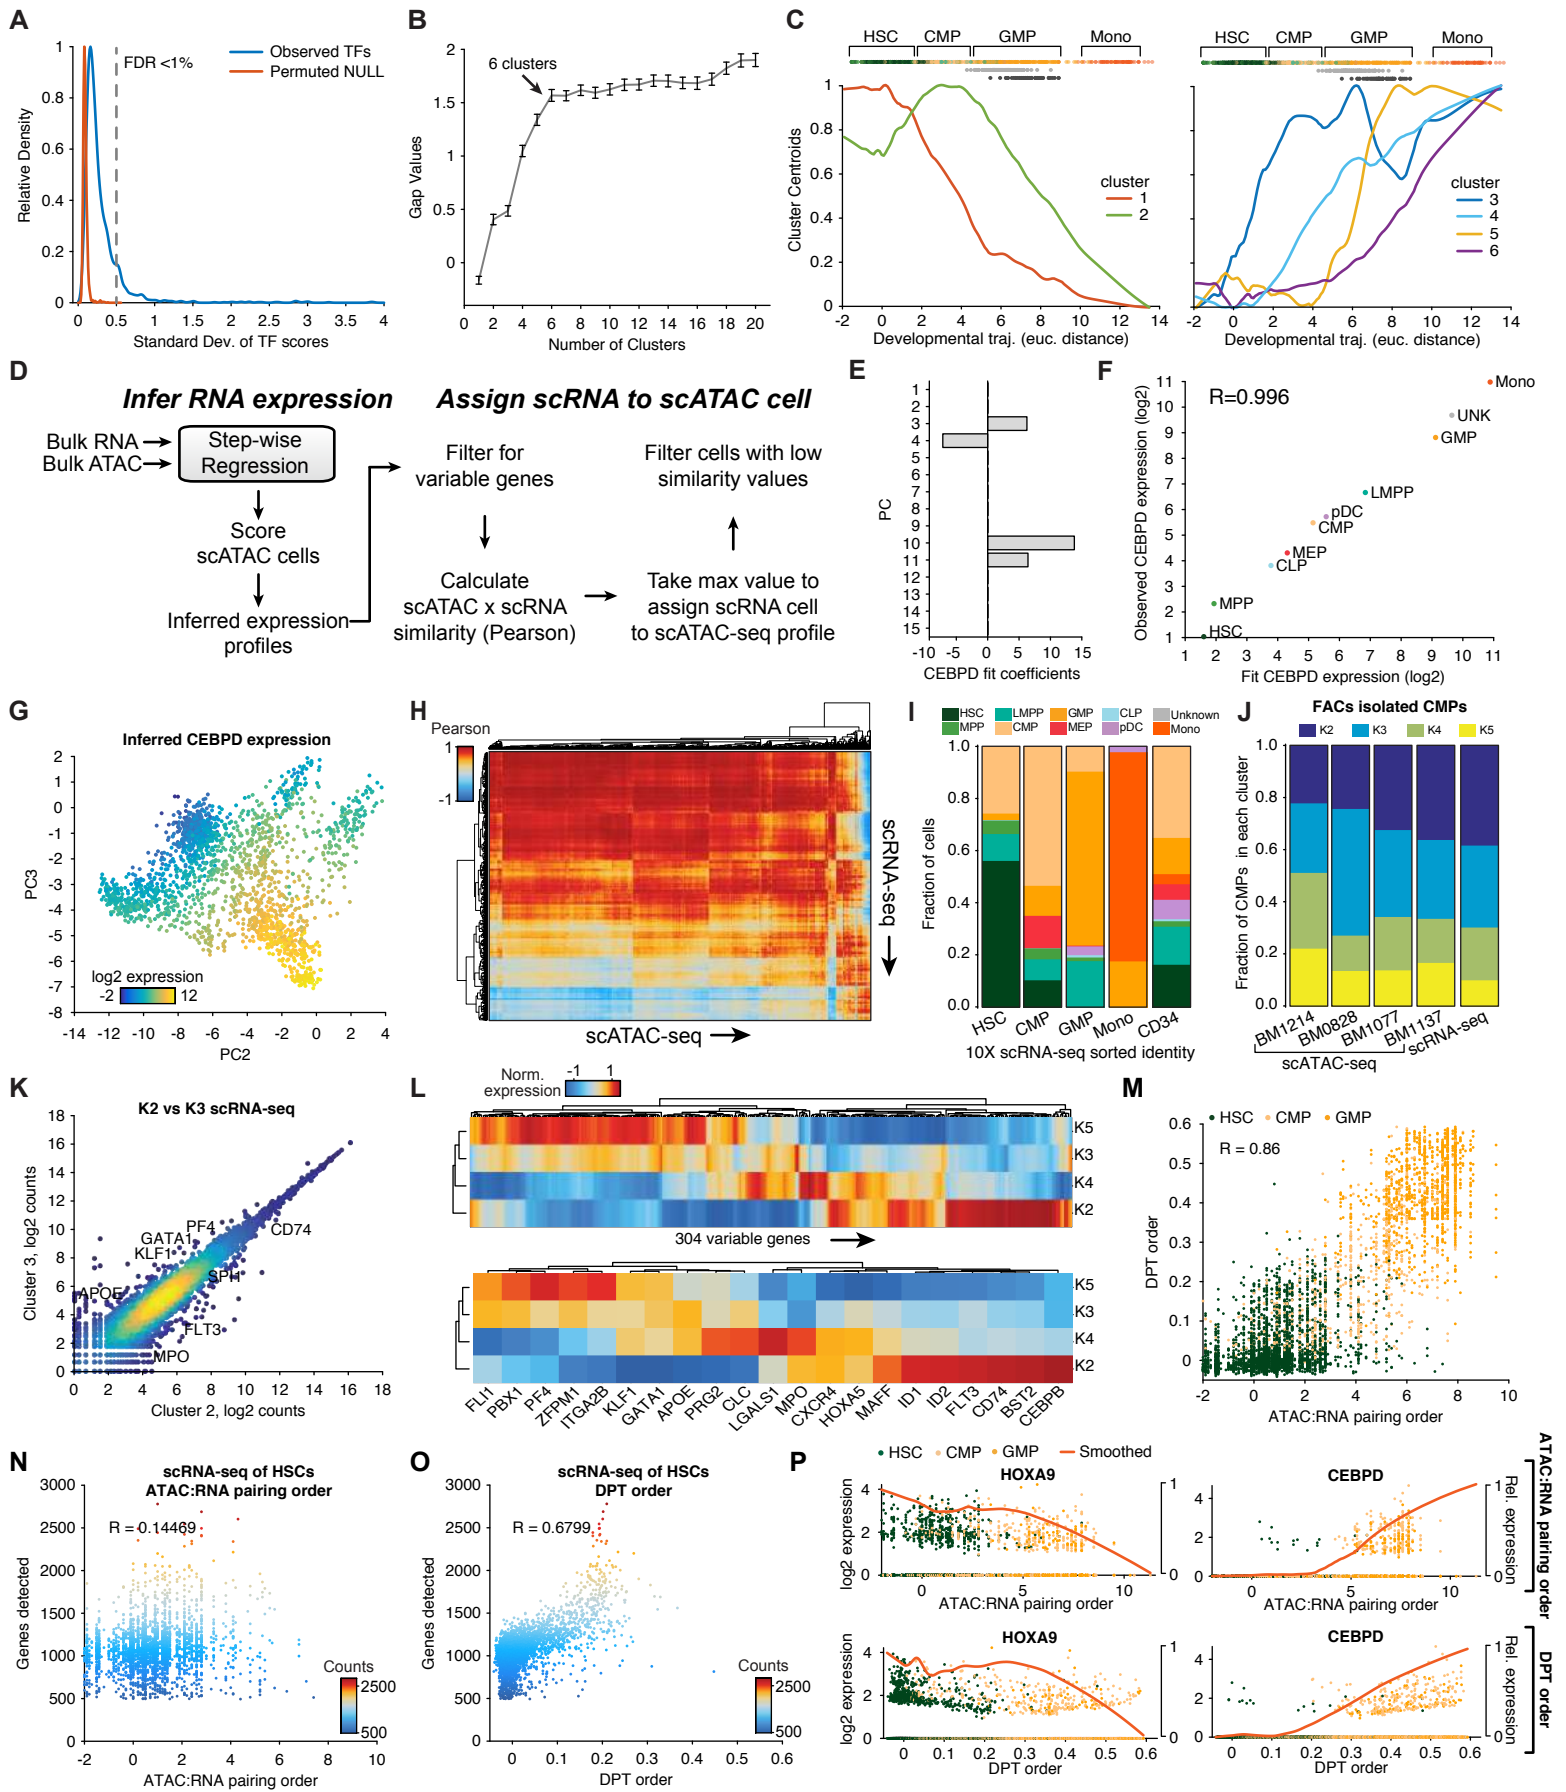

Supplemental Figure 5

Supplement: NIHMS963511-supplement-6.pdf [file NIHMS963511-supplement-6.pdf]

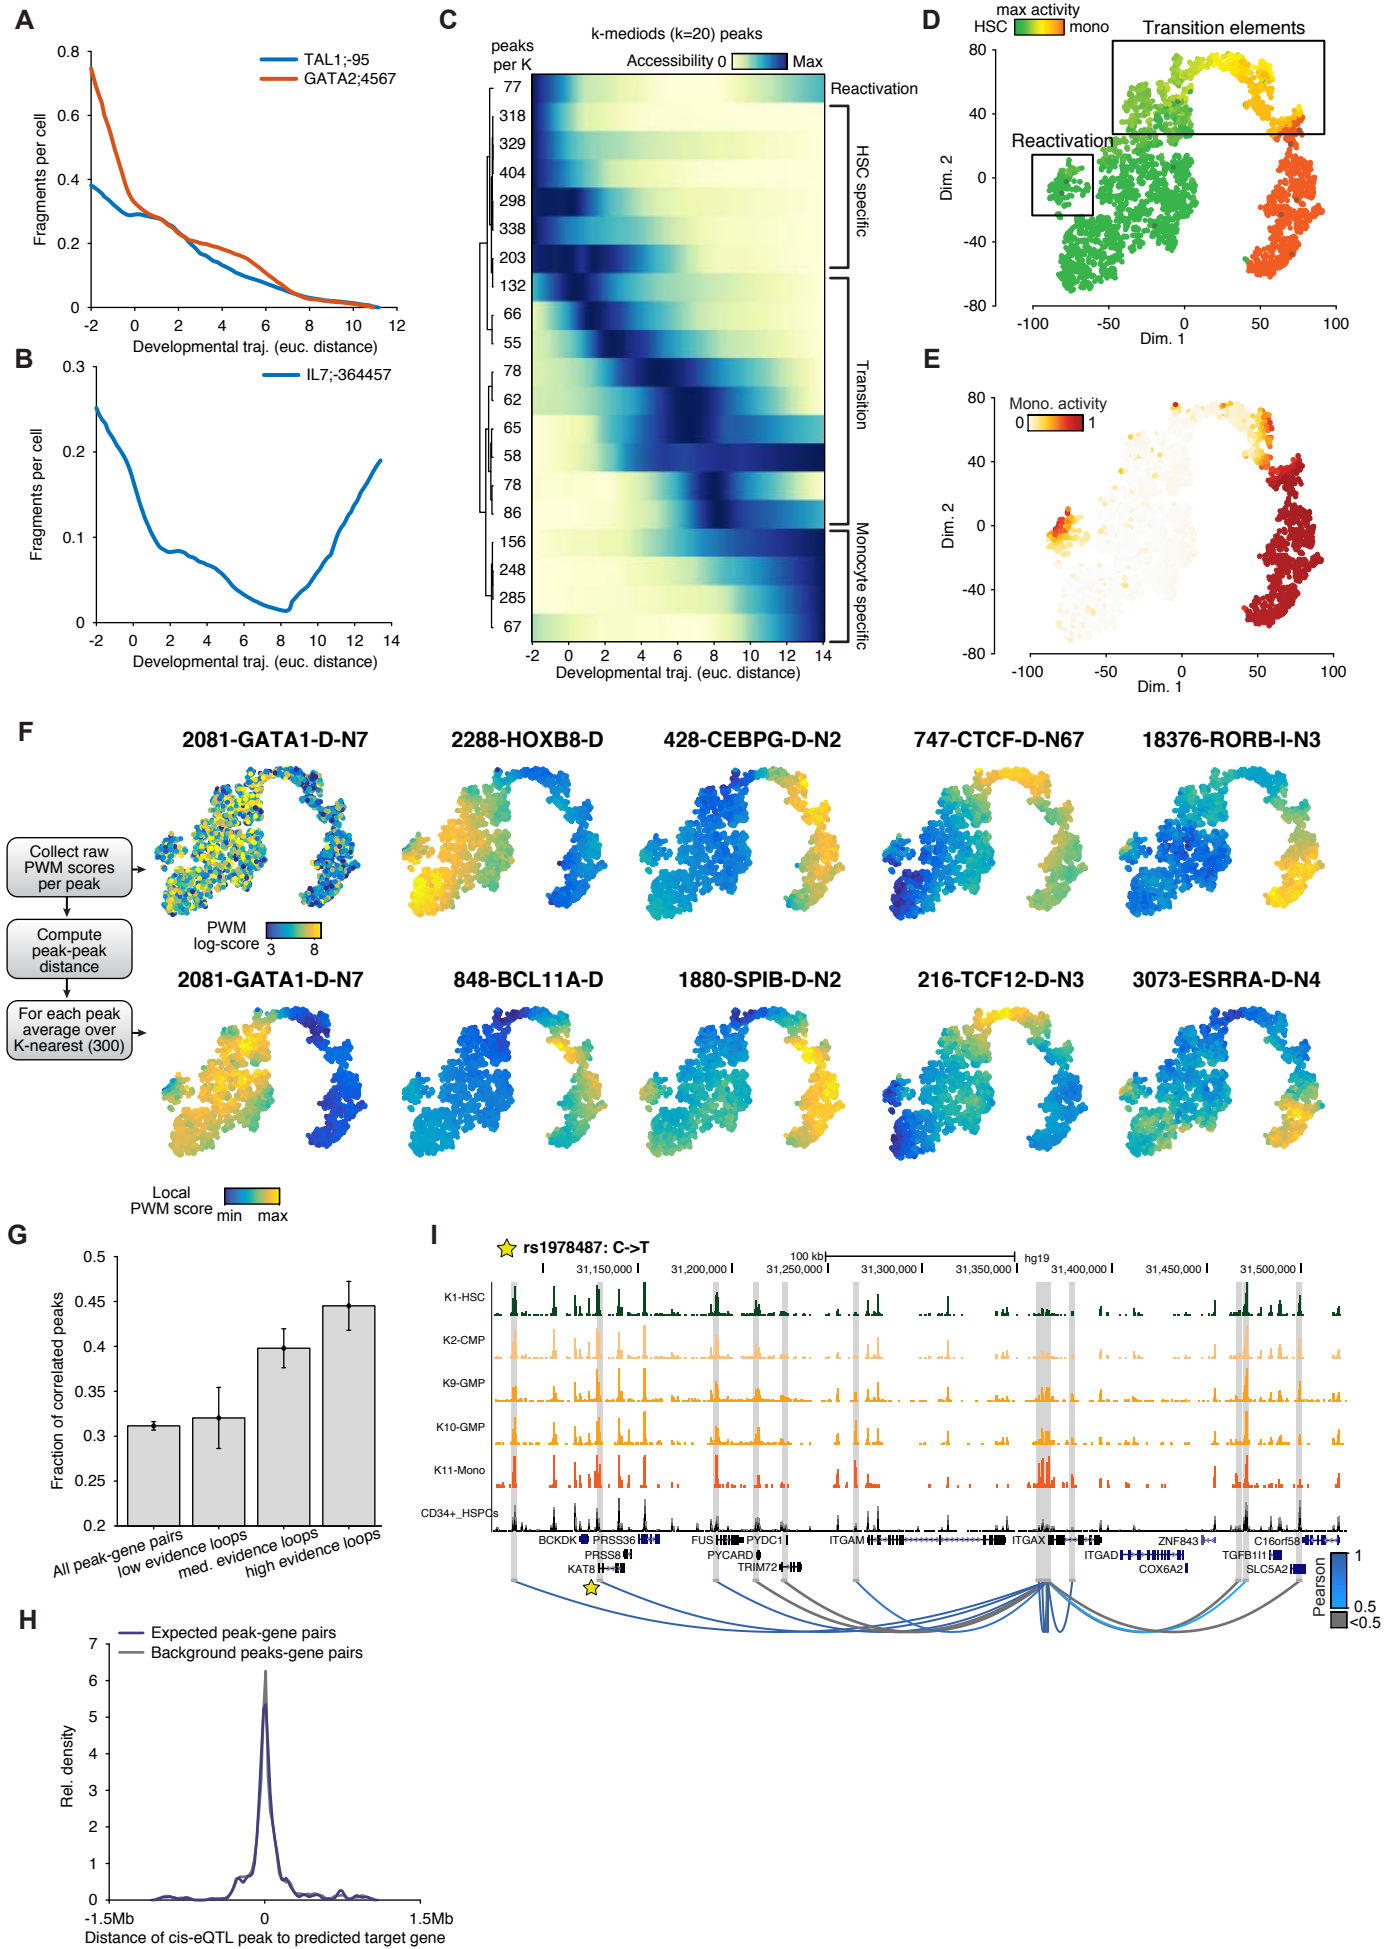

Supplemental Figure 6

Supplement: NIHMS963511-supplement-7.pdf [file NIHMS963511-supplement-7.pdf]
